# Supplementary material for: Genotypic Diversity within a Single Pseudomonas aeruginosa Strain Commonly Shared by Australian Patients with Cystic Fibrosis
Source: PubMed Central journal article supplement (PMC4669131; doi:10.1371/journal.pone.0144022), 2015-12-03
Supplement: pone.0144022.s001.pdf [file pone.0144022.s001.pdf]

10 20 30 40 50 60 70 80 90 100

PA01 TATAATCAATCATGACTGATTAAATTAATGGCGTTTCTGTAAACATATCCCTTATGATCTGCGCGCCCTTCCC-TTGTGAGGACGTTCAGTGGCCAGGAAA

MEX001

MEX002

MEX003

MEX004

MEX005

MEX006

MEX007

MEX008

MEX009

MEX010

MEX011

MEX012

MEX013

MEX014

MEX015

MEX016

MEX017

MEX018

MEX019

MEX020

MEX021

MEX022

MEX023

MEX024

MEX025

110 120 130 140 150 160 170 180 190 200

PA01 ACCAAAGAGGAAATCCAGAAAACCCGCGACGGCATACTCGATGCCGCCGAGCGGGTTTTCCTGGAAAAGGGCGTGGGCACCACTGCCATGGCCGACCTGG

MEX001

MEX002

MEX003

MEX004

MEX005

MEX006

MEX007

MEX008

MEX009

MEX010

MEX011

MEX012

MEX013

MEX014

MEX015

MEX016

MEX017

MEX018

MEX019

MEX020

MEX021

MEX022

MEX023

MEX024

MEX025

210 220 230 240 250 260 270 280 290 300

PA01 CGGACGCCCGGGGTTTCTCGCGGTGCGGTCTACGGCCACTACAAGAA-----CAAGATCGAGGTCTGCCTGGCGATGTGCGACCGCGCCTTCGGCCA

MEX001

MEX002

MEX003

MEX004

MEX005

MEX006

MEX007

MEX008

MEX009

MEX010

MEX011

MEX012

MEX013

MEX014

MEX015

MEX016

MEX017  
MEX018  
MEX019  
MEX020  
MEX021  
MEX022  
MEX023  
MEX024  
MEX025

310 320 330 340 350 360 370 380 390 400

PA01 GATCGAGGTACCCGACGAAAACGCCAGGGTGCCGGCGCTGGATATCCTCCTGCCGCCGGGCATGGGCTTCTCCGCCAGTGCTGCGAGCCCGGTTCGGTG  
MEX001  
MEX002 .T  
MEX003 .T  
MEX004  
MEX005  
MEX006  
MEX007  
MEX008  
MEX009  
MEX010  
MEX011  
MEX012 C  
MEX013  
MEX014  
MEX015  
MEX016  
MEX017  
MEX018  
MEX019  
MEX020  
MEX021  
MEX022  
MEX023  
MEX024  
MEX025

410 420 430 440 450 460 470 480 490 500

PA01 CAGCGGGTGGAGATCCTTACCTCAAGTGCGAACGCAGCGACGAGAACGAGCCGCTGTGCGCCGCCCGAGCTGCTCGAGAAGCAGGGGCAACGCT  
MEX001  
MEX002 C  
MEX003 C  
MEX004  
MEX005  
MEX006 T  
MEX007  
MEX008  
MEX009  
MEX010  
MEX011  
MEX012 C  
MEX013  
MEX014  
MEX015 T.T  
MEX016  
MEX017  
MEX018  
MEX019  
MEX020  
MEX021  
MEX022  
MEX023  
MEX024  
MEX025 C

510 520 530 540 550 560 570 580 590 600

PA01 TCGGCCTCCGGCAGATCCGCCGGGCGGTGGAACGCAGCGCAACTGCCGGCGCGGCTGGACGTCGAGCTGGCCAGCATCTATCTGCAATCGCTCT  
MEX001 G  
MEX002 G  
MEX003 G  
MEX004 G  
MEX005 A G  
MEX006 G T

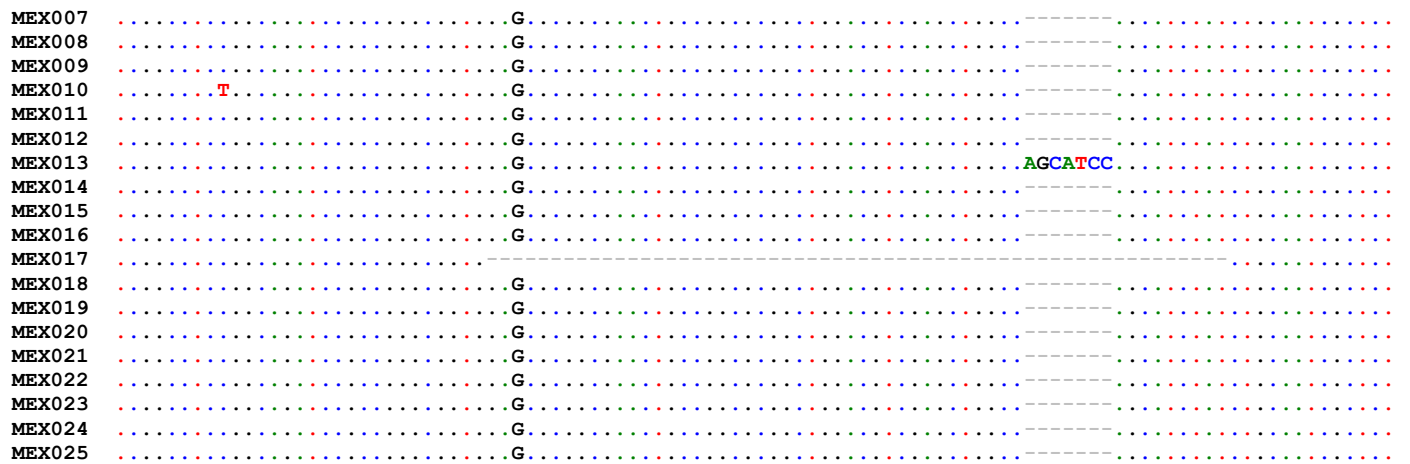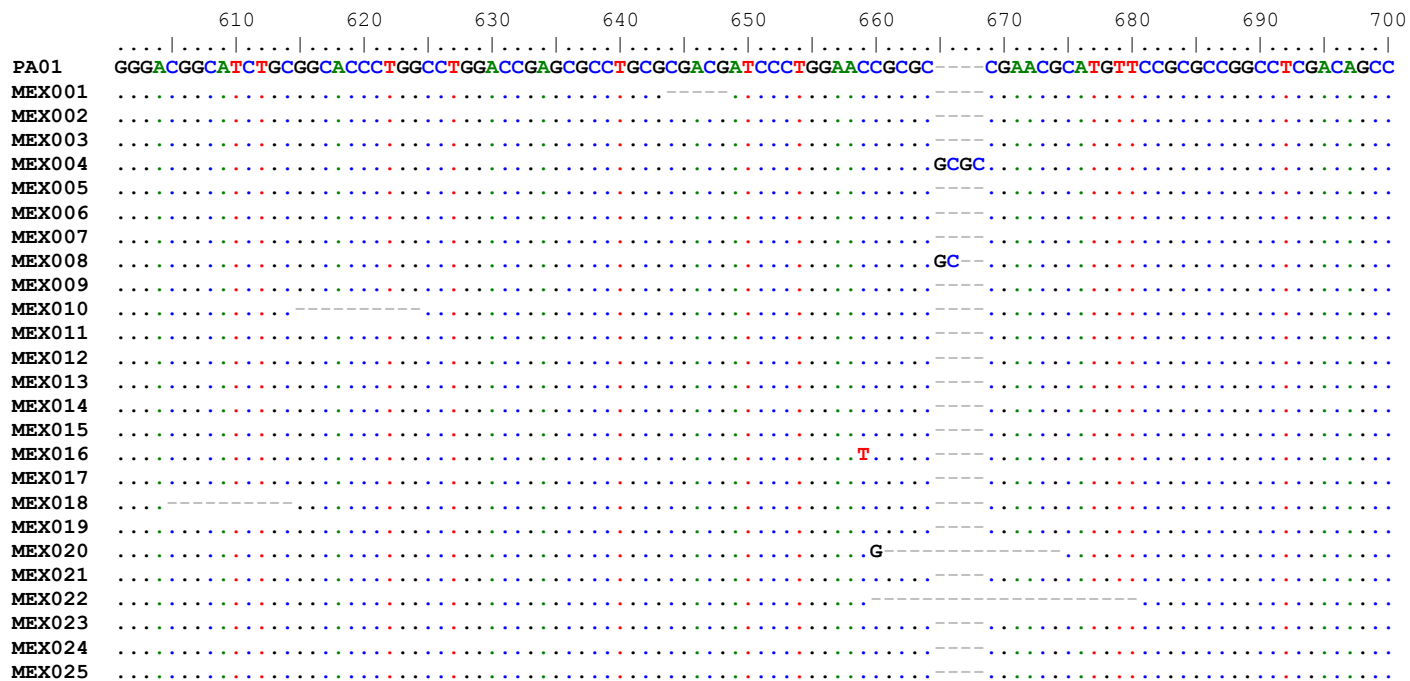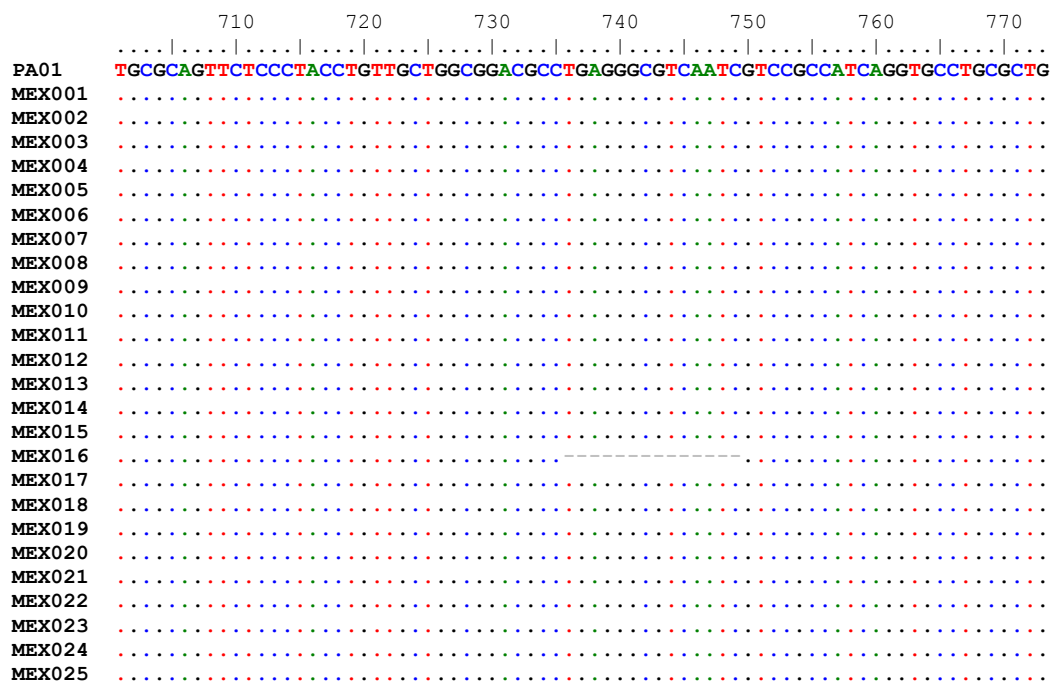

Supplementary Figure 1. Nucleotide sequence variation among the 25 *Pseudomonas aeruginosa mexZ* gene sequences.
