# Supplementary material for: Genotypic Diversity within a Single Pseudomonas aeruginosa Strain Commonly Shared by Australian Patients with Cystic Fibrosis
Source: PubMed Central journal article supplement (PMC4669131; doi:10.1371/journal.pone.0144022), 2015-12-03
Supplement: pone.0144022.s002.pdf [file pone.0144022.s002.pdf]

|         | 10                                                                                                  | 20 | 30 | 40 | 50 | 60 | 70 | 80 | 90 | 100 |  |
|---------|-----------------------------------------------------------------------------------------------------|----|----|----|----|----|----|----|----|-----|--|
| PA01    | MALVDGFLELERSSGKLEWSAILQKMASDLGFSK--ILFGL--LPKDSQDYENAFIVGNYP--AAWREHYDRAGYARVDPTVS--HCTQS--VLPIFWE |    |    |    |    |    |    |    |    |     |  |
| LASR001 | .....                                                                                               |    |    |    |    |    |    |    |    |     |  |
| LASR002 | .....                                                                                               |    |    |    |    |    |    |    |    |     |  |
| LASR003 | .....                                                                                               |    |    |    |    |    |    |    |    |     |  |
| LASR004 | .....ITTTGLATR.ST.RSV..PRAY.RF.GNRPSTRR.                                                            |    |    |    |    |    |    |    |    |     |  |
| LASR005 | .....R.....                                                                                         |    |    |    |    |    |    |    |    |     |  |
| LASR006 | .....                                                                                               |    |    |    |    |    |    |    |    |     |  |
| LASR007 | .....                                                                                               |    |    |    |    |    |    |    |    |     |  |
| LASR008 | .....                                                                                               |    |    |    |    |    |    |    |    |     |  |
| LASR009 | .....                                                                                               |    |    |    |    |    |    |    |    |     |  |
| LASR010 | .....                                                                                               |    |    |    |    |    |    |    |    |     |  |
| LASR011 | .....R.....                                                                                         |    |    |    |    |    |    |    |    |     |  |
| LASR012 | .....LEDPVRPVAG--Q.GLRERLHRRQLP.RLA--R.L.PGWL...RPDGQSLYP--ER.AD--F.GTVHL                           |    |    |    |    |    |    |    |    |     |  |
| LASR013 | .....                                                                                               |    |    |    |    |    |    |    |    |     |  |
| LASR014 | .....                                                                                               |    |    |    |    |    |    |    |    |     |  |
| LASR015 | .....                                                                                               |    |    |    |    |    |    |    |    |     |  |
| LASR016 | .....                                                                                               |    |    |    |    |    |    |    |    |     |  |
| LASR017 | .....                                                                                               |    |    |    |    |    |    |    |    |     |  |
| LASR018 | .....                                                                                               |    |    |    |    |    |    |    |    |     |  |
| LASR019 | .....                                                                                               |    |    |    |    |    |    |    |    |     |  |
| LASR020 | .....                                                                                               |    |    |    |    |    |    |    |    |     |  |
| LASR021 | .....                                                                                               |    |    |    |    |    |    |    |    |     |  |
| LASR022 | .....ILG--Q.GLRERLHRRQLP.RLA--R.L.PGWL...RPDGQSLYP--ER.AD--F.GTVHL                                  |    |    |    |    |    |    |    |    |     |  |
| LASR023 | .....N.....                                                                                         |    |    |    |    |    |    |    |    |     |  |
| LASR024 | .....                                                                                               |    |    |    |    |    |    |    |    |     |  |
| LASR025 | .....CC.RTARTTRTPSSSATTR.PG.SITTGLATR.ST.RSV..PRAY.RF.GNRPSTRR.                                     |    |    |    |    |    |    |    |    |     |  |
| LASR026 | .....                                                                                               |    |    |    |    |    |    |    |    |     |  |
| LASR027 | .....                                                                                               |    |    |    |    |    |    |    |    |     |  |
| LASR028 | .....                                                                                               |    |    |    |    |    |    |    |    |     |  |
| LASR029 | .....                                                                                               |    |    |    |    |    |    |    |    |     |  |
| LASR030 | .....                                                                                               |    |    |    |    |    |    |    |    |     |  |
| LASR031 | .....V.....G.....                                                                                   |    |    |    |    |    |    |    |    |     |  |
| LASR032 | .....                                                                                               |    |    |    |    |    |    |    |    |     |  |
| LASR033 | .....                                                                                               |    |    |    |    |    |    |    |    |     |  |
| LASR034 | .....                                                                                               |    |    |    |    |    |    |    |    |     |  |
| LASR035 | .....                                                                                               |    |    |    |    |    |    |    |    |     |  |
| LASR036 | .....                                                                                               |    |    |    |    |    |    |    |    |     |  |
| LASR037 | .....C.....                                                                                         |    |    |    |    |    |    |    |    |     |  |
| LASR038 | .....                                                                                               |    |    |    |    |    |    |    |    |     |  |
| LASR039 | .....                                                                                               |    |    |    |    |    |    |    |    |     |  |
| LASR040 | .....                                                                                               |    |    |    |    |    |    |    |    |     |  |

|         | 110                  | 120   | 130                                                                                  | 140   | 150                                             | 160   | 170                                    | 180   | 190   | 200    |
|---------|----------------------|-------|--------------------------------------------------------------------------------------|-------|-------------------------------------------------|-------|----------------------------------------|-------|-------|--------|
| PA01    | PSIYQTRKQHEFFEEASAAG | ----- | LVYGLTMPLHGARGELGALSLSVEAENRAEAN                                                     | ----- | RFMESVLPTLWMLKDYALQSGAGLAFEH                    | ----- | PVSKPVVLTSR                            |       |       |        |
| LASR001 | .....                | ----- | .....                                                                                | ----- | .....                                           | ----- | .....                                  | ..... | ..... | .....  |
| LASR002 | .....                | ----- | .....I.....                                                                          | ----- | .....                                           | ----- | .....                                  | ..... | ..... | .....  |
| LASR003 | .....                | ----- | .....                                                                                | ----- | .....                                           | ----- | .....                                  | ..... | ..... | .....  |
| LASR004 | S.TSSS..PRP--P.WCM.  | ----- | PCRCMVLAANS..                                                                        | ----- | .SAWKRKTGP.PTVS                                 | ----- | WSR.CR.CGCSRTTHCRAVPDWPS--NIR.ANRWFPAG |       |       |        |
| LASR005 | .....                | ----- | .....                                                                                | ----- | .....                                           | ----- | .....                                  | ..... | ..... | .....  |
| LASR006 | .....                | ----- | .....                                                                                | ----- | .....                                           | ----- | .....                                  | ..... | ..... | .....  |
| LASR007 | .....                | ----- | .....                                                                                | ----- | .....R--FMES.CR.CGCSRTTHCRAVPDWPS--NIR.ANRWFPAG |       |                                        |       |       |        |
| LASR008 | .....                | ----- | .....R--PCRCMVLAANS..                                                                | ----- | .SAWKRKTGP.PTVS                                 | ----- | WSR.CR.CGCSRTTHCRAVPDWPS--NIR.ANRWFPAG |       |       |        |
| LASR009 | .....                | ----- | .....                                                                                | ----- | .....RFMESVLPT.WM.KDYALQSGGT.LRTSGQQTGGSD--QPG  |       |                                        |       |       |        |
| LASR010 | .....                | ----- | .....                                                                                | ----- | .....                                           | ----- | .....                                  | ..... | ..... | .....  |
| LASR011 | .....                | ----- | .....                                                                                | ----- | .....                                           | ----- | .....                                  | ..... | ..... | .....  |
| LASR012 | .DAKAA.VLRGSLGRR--P. | ----- | VWADHAAAWCSR.TRRAEPQRGSCKPG.GQPFHGVGPADP.DAQGLRTAERCR-T.LRTSGQQTGGSD--QPG            |       |                                                 |       |                                        |       |       |        |
| LASR013 | .....                | ----- | .....SAA..VYGRCSR.TRRAEPQRGSCKPG.GQPFHGVGPADP.DAQGLRTAERCR-T.LRTSGQQTGGSD--QPG       |       |                                                 |       |                                        |       |       |        |
| LASR014 | .....                | ----- | .....LVY-GGPCRCMVLAANS..                                                             | ----- | .SAWKRKTGP.PTVS                                 | ----- | WSR.CR.CGCSRTTHCRAVPDWPS--NIR.ANRWFPAG |       |       |        |
| LASR015 | .....                | ----- | .....                                                                                | ----- | .....                                           | ----- | .....                                  | ..... | ..... | .....  |
| LASR016 | .....                | ----- | .....                                                                                | ----- | .....                                           | ----- | .....                                  | ..... | ..... | .....  |
| LASR017 | .....                | ----- | .....                                                                                | ----- | .....                                           | ----- | .....                                  | ..... | ..... | .....  |
| LASR018 | .....                | ----- | .....                                                                                | ----- | .....                                           | ----- | .....                                  | ..... | ..... | .....  |
| LASR019 | .....                | ----- | .....                                                                                | ----- | .....                                           | ----- | .....                                  | ..... | ..... | .....  |
| LASR020 | .....                | ----- | .....                                                                                | ----- | .....                                           | ----- | .....                                  | ..... | ..... | .....  |
| LASR021 | .....                | ----- | .....                                                                                | ----- | .....                                           | ----- | .....                                  | ..... | ..... | .....  |
| LASR022 | .DAKAA.VLRGSLGRR--P. | ----- | VWADHAAAWCSR.TRRAEPQRGSCKPG.GQPFHGVGPADP.DAQGLRTAERCR-T.LRTSGQQTGGSD--QPG            |       |                                                 |       |                                        |       |       |        |
| LASR023 | .....                | ----- | .....                                                                                | ----- | .....                                           | ----- | .....                                  | ..... | ..... | .....  |
| LASR024 | .....                | ----- | .....                                                                                | ----- | .....                                           | ----- | .....                                  | ..... | ..... | .....  |
| LASR025 | S.TSSS..PRP--P.WCM.  | ----- | PCRCMVLAANS..                                                                        | ----- | .SAWKRKTGP.PTVS                                 | ----- | WSR.CR.CGCSRTTHCRAVPDWPS--NIR.ANRWFPAG |       |       |        |
| LASR026 | .....                | ----- | .....                                                                                | ----- | .....R-FMDADP.DAQGLRTAERCR-T.LRTSGQQTGGSD--QPG  |       |                                        |       |       |        |
| LASR027 | .....                | ----- | .....                                                                                | ----- | .....                                           | ----- | .....                                  | ..... | ..... | .....  |
| LASR028 | .....                | ----- | .....LVYGLTMPCRCMVLAANS..                                                            | ----- | .SAWKRKTGP.PTVS                                 | ----- | WSR.CR.CGCSRTTHCRAVPDWPS--NIR.ANRWFPAG |       |       |        |
| LASR029 | .....                | ----- | .....                                                                                | ----- | .....                                           | ----- | .....R.ANRWFPAG                        |       |       |        |
| LASR030 | .....                | ----- | .....                                                                                | ----- | .....                                           | ----- | .....                                  | ..... | ..... | .....  |
| LASR031 | .....                | ----- | .....                                                                                | ----- | .....                                           | ----- | .....                                  | ..... | ..... | .....  |
| LASR032 | .....                | ----- | .....                                                                                | ----- | .....                                           | ----- | .....                                  | ..... | ..... | .....W |
| LASR033 | .....                | ----- | .....                                                                                | ----- | .....                                           | ----- | .....                                  | ..... | ..... | .....  |
| LASR034 | .....                | ----- | .....                                                                                | ----- | .....                                           | ----- | .....                                  | ..... | ..... | .....  |
| LASR035 | .....                | ----- | .....                                                                                | ----- | .....                                           | ----- | .....                                  | ..... | ..... | .....  |
| LASR036 | .....                | ----- | .....                                                                                | ----- | .....                                           | ----- | .....                                  | ..... | ..... | .....  |
| LASR037 | .....                | ----- | .....                                                                                | ----- | .....                                           | ----- | .....                                  | ..... | ..... | .....  |
| LASR038 | .....                | ----- | .....A-----VWADHAAAWCSR.TRRAEPQRGSCKPG.GQPFHGVGPADP.DAQGLRTAERCR-T.LRTSGQQTGGSD--QPG |       |                                                 |       |                                        |       |       |        |
| LASR039 | .....                | ----- | .....                                                                                | ----- | .....                                           | ----- | .....                                  | ..... | ..... | .....  |
| LASR040 | .....                | ----- | .....                                                                                | ----- | .....                                           | ----- | .....                                  | ..... | ..... | .....  |

|         | 210                                                      | 220          | 230          | 240    | 250           |
|---------|----------------------------------------------------------|--------------|--------------|--------|---------------|
| PA01    | EKEVLQWCAIGKTSWEISVICNCSEANVNFHMGNI                      | RRKFGVTSRRVA | AIMAVNLGLITL |        |               |
| LASR001 | .....                                                    | .....        | .....        | .....  | .....         |
| LASR002 | .....                                                    | .....        | .....        | .....  | .....         |
| LASR003 | .....                                                    | .....        | .....        | .....  | C.....        |
| LASR004 | RR--KC.SGAPSARPVGRYR--LS.TARKP.TS.WEI.GS.VPP.RPLWP.IWVL. |              |              |        |               |
| LASR005 | .....                                                    | .....        | .....        | .....  | .....         |
| LASR006 | .....                                                    | .....        | .....        | .....  | G.....        |
| LASR007 | RR--KC.SGAPSARPVGRYR--LS.TARKP.TS.WEI.GS.VPP.RPLWP.IWVL. |              |              |        |               |
| LASR008 | RR--KC.SGAPSARPVGRYR--LS.TARKP.TS.WEI.GS.VPP.RPLWP.IWVL. |              |              |        |               |
| LASR009 | .GS.AVVRHRQDQLGD.GYLQ-LLGSQCELPY.KYSAEVRCDLPPRS          |              |              |        | GHYGRFGSYYS.  |
| LASR010 | .....                                                    | .....        | .....        | .....  | .....         |
| LASR011 | .....                                                    | .....        | .....        | .....  | .....         |
| LASR012 | .GS.AVVRHRQDQLGD.GYLQ-LLGSQCELPY.KYSAEVRCDLPPRS          |              |              |        | GHYGRFGSYYS-  |
| LASR013 | .GS.AVVRHRQDQLGD.GYLQ-LLGSQCELPY.KYSAEVRCDLPPRS          |              |              |        | GHYGRFGSYYS.  |
| LASR014 | RR--KC.SGAPSARPVGRYR--LS.TARKP.TS.WEI.GS.VPP.RPLWP.IWVL. |              |              |        |               |
| LASR015 | .....                                                    | .....        | .....        | .....  | N.....        |
| LASR016 | .....                                                    | .....        | .....        | .....  | V.G.....      |
| LASR017 | .....                                                    | .....        | .....        | V..... | .....         |
| LASR018 | .....                                                    | .....        | .....        | .....  | .....         |
| LASR019 | ..--EVLQWCAIGKTSWRYP--LS.TARKP.TS.WEI.GS.VPP.RPLWP.IWVL. |              |              |        |               |
| LASR020 | .....                                                    | .....        | .....        | .....  | HYGRF.SYYS    |
| LASR021 | .....                                                    | .....        | .....        | R..... | .....         |
| LASR022 | .GS.AVVRHRQDQLGD.GYLQ-LLGSQCELPY.KYSAEVRCDLPPRS          |              |              |        | GHYGRFGSYYS-  |
| LASR023 | .....                                                    | .....        | .....        | .....  | .....         |
| LASR024 | .....                                                    | .....        | .....        | .....  | .....         |
| LASR025 | RR--KC.SGAPSARPVGRYR--LS.TARKP.TS.WEI.GS.VPP.RPLWP.IWVL. |              |              |        |               |
| LASR026 | .GS.AVVRHRQDQLGD.GYLQ-LLGSQCELPY.KYSAEVRCDLPPRS          |              |              |        | GHYGRFGSYYS.  |
| LASR027 | .....                                                    | .....        | .....        | .....  | SGHYGRFGSYYS- |
| LASR028 | RR--KC.SGAPSARPVGRYR--LS.TARKP.TS.WEI.GS.VPP.RPLWP.IWVL. |              |              |        |               |
| LASR029 | RR--KC.SGAPSARPVGRYR--LS.TARKP.TS.WEI.GS.VPP.RPLWP.IWVL. |              |              |        |               |
| LASR030 | .....                                                    | .....        | .....        | .....  | .....         |
| LASR031 | .....                                                    | .....        | .....        | .....  | .....         |
| LASR032 | .....                                                    | .....        | .....        | .....  | .....         |
| LASR033 | .....                                                    | .....        | .....        | .....  | YGRFGSYYS-    |
| LASR034 | .....                                                    | .....        | .....        | .....  | .....         |
| LASR035 | .....                                                    | .....        | .....        | .....  | Y.....        |
| LASR036 | .....                                                    | .....        | .....        | .....  | W.....        |
| LASR037 | .....                                                    | .....        | .....        | .....  | .....         |
| LASR038 | .GS.AVVRHRQDQLGD.GYLQ-LLGSQCELPY.KYSAEVRCDLPPRS          |              |              |        | GHYGRFGSYYS.  |
| LASR039 | .....                                                    | .....        | .....        | .....  | V.....        |
| LASR040 | .....                                                    | A.....       | .....        | .....  | .....         |

Supplementary Figure 2. Sequence variation among the 40 *Pseudomonas aeruginosa* LasR amino acid sequences.
